# Supplementary material
Source: PubMed Central journal article supplement (PMC2749072)
Supplement: NIHMS119978-supplement-1.pdf [file NIHMS119978-supplement-1.pdf]

| Tissue Section        | CXCR4+ Cells |         | CXCR4- Cells |         |
|-----------------------|--------------|---------|--------------|---------|
|                       | Mouse 1      | Mouse 2 | Mouse 3      | Mouse 4 |
| Tibialis Anterior (T) |              |         |              |         |
| T1                    | 150          | 102     | 21           | 28      |
| T2                    | 75           | 99      | 60           | 43      |
| T3                    | 125          | 120     | 45           | 24      |
| T4                    | 78           | 68      | 55           | 57      |
| T5                    | 88           | 96      | 48           | 33      |
| Quadriceps (Q)        |              |         |              |         |
| Q1                    | 235          | 220     | 48           | 53      |
| Q2                    | 330          | 265     | 63           | 36      |
| Q3                    | 123          | 145     | 88           | 44      |
| Q4                    | 323          | 235     | 62           | 27      |
| Q5                    | 145          | 120     | 92           | 42      |

  

| Tissue Section        | CXCR4+ Cells & Ab |         | Freshly Isolated SP Cells |         |
|-----------------------|-------------------|---------|---------------------------|---------|
|                       | Mouse 5           | Mouse 6 | Mouse 7                   | Mouse 8 |
| Tibialis Anterior (T) |                   |         |                           |         |
| T1                    | 80                | 75      | 18                        | 7       |
| T2                    | 34                | 43      | 20                        | 15      |
| T3                    | 42                | 23      | 22                        | 24      |
| T4                    | 42                | 42      | 8                         | 26      |
| T5                    | 72                | 44      | 0                         | 11      |
| Quadriceps (Q)        |                   |         |                           |         |
| Q1                    | 72                | 80      | 11                        | 8       |
| Q2                    | 88                | 46      | 15                        | 6       |
| Q3                    | 66                | 100     | 6                         | 12      |
| Q4                    | 102               | 78      | 12                        | 17      |
| Q5                    | 92                | 97      | 6                         | 5       |

**Supplemental Table 1. Number of eGFP-positive mononuclear cells in skeletal**

**muscle sections from mice transplanted with different fractions of eGFP-positive**

**donor cells.** A significantly greater number of eGFP-positive mononuclear cells were

identified in tibialis anterior and quadriceps muscle sections from mice who were

transplanted with CXCR4-positive eGFP-positive SP-derived cultured cells than from

mice who received CXCR4-negative eGFP-positive SP-derived cultured cells ( $p < 0.001$ );

CXCR4-positive eGFP-positive SP-derived cultured cells pretreated with a CXCR4

blocking antibody ( $p < 0.001$ ); and eGFP-positive freshly isolated SP cells ( $p < 0.001$ ) by

one-tailed t-test. SP = side population. Ab = blocking antibody against CXCR4. T1-T5 =

sections from tibialis anterior muscle. Q1-Q5 = sections from quadriceps muscle. eGFP =

enhanced green fluorescent protein.

**Supplemental Table 2. Percent Engraftment of eGFP-positive donor cells into *mdx*<sup>5cv</sup> skeletal muscle 30 days after transplantation.**

| Tissue Section               | CXCR4+ Cells      |         |         | CXCR4- Cells              |          |          |
|------------------------------|-------------------|---------|---------|---------------------------|----------|----------|
|                              | Mouse 1           | Mouse 2 | Mouse 3 | Mouse 4                   | Mouse 5  | Mouse 6  |
| <b>Tibialis Anterior (T)</b> |                   |         |         |                           |          |          |
| T1                           | 0%                | 0%      | 0%      | 0%                        | 0%       | 0%       |
| T2                           | 1.79%             | 0%      | 7.32%   | 0%                        | 0%       | 0%       |
| T3                           | 0%                | 7.04%   | 0%      | 0%                        | 0%       | 2.56%    |
| T4                           | 8.14%             | 4.17%   | 4.88%   | 0%                        | 5.56%    | 0%       |
| T5                           | 3.08%             | 4.44%   | 6.25%   | 0%                        | 0%       | 5.62%    |
| T6                           | 3.13%             | 0%      | 6.82%   | 0%                        | 2.70%    | 0%       |
| T7                           | 1.12%             | 5.26%   | 0%      | 4.17%                     | 3.37%    | 0%       |
| T8                           | 0%                | 0%      | 0%      | 2.67%                     | 2.78%    | 4.35%    |
| T9                           | 0%                | 7.14%   | 0%      | 3.49%                     | 0%       | 6.56%    |
| T10                          | 0%                | 0%      | 6.67%   | 1.45%                     | 0%       | 0%       |
| <b>Quadriceps (Q)</b>        |                   |         |         |                           |          |          |
| Q1                           | 0%                | 0%      | 0%      | 0%                        | 0%       | 0%       |
| Q2                           | 0.60%             | 7.59%   | 0%      | 2.22%                     | 0%       | 0%       |
| Q3                           | 0%                | 0%      | 6.90%   | 1.99%                     | 2.11%    | 0.50%    |
| Q4                           | 1.48%             | 0%      | 8.25%   | 2.48%                     | 2.78%    | 0.50%    |
| Q5                           | 3.81%             | 7.07%   | 0.53%   | 3.70%                     | 0.50%    | 2.78%    |
| Q6                           | 2.40%             | 7.76%   | 0%      | 0.34%                     | 4.17%    | 4.52%    |
| Q7                           | 7.28%             | 0.45%   | 5.06%   | 0%                        | 2.27%    | 2.13%    |
| Q8                           | 0%                | 5.67%   | 7.35%   | 0%                        | 0%       | 0%       |
| Q9                           | 0%                | 0%      | 6.20%   | 0%                        | 0%       | 3.57%    |
| Q10                          | 0%                | 0%      | 0%      | 0%                        | 0%       | 3.28%    |
| Tissue Section               | CXCR4+ Cells & Ab |         |         | Freshly Isolated SP Cells |          |          |
|                              | Mouse 7           | Mouse 8 | Mouse 9 | Mouse 10                  | Mouse 11 | Mouse 12 |
| <b>Tibialis Anterior (T)</b> |                   |         |         |                           |          |          |
| T1                           | 0%                | 0%      | 0%      | 0%                        | 0%       | 0%       |
| T2                           | 0%                | 0%      | 0%      | 0%                        | 0%       | 0%       |
| T3                           | 1.54%             | 0%      | 0%      | 0%                        | 0%       | 0%       |
| T4                           | 7.14%             | 0%      | 4.41%   | 0%                        | 0%       | 1.79%    |
| T5                           | 4.65%             | 5.88%   | 0%      | 0%                        | 0%       | 0%       |
| T6                           | 5.06%             | 6.06%   | 0%      | 0%                        | 0%       | 0%       |
| T7                           | 1.30%             | 0%      | 7.95%   | 0%                        | 0%       | 0%       |
| T8                           | 1.16%             | 6.33%   | 11.11%  | 0%                        | 0%       | 0%       |
| T9                           | 2.63%             | 7.32%   | 5.88%   | 0%                        | 0%       | 0%       |
| T10                          | 0%                | 0%      | 7.55%   | 0%                        | 0%       | 0%       |
| <b>Quadriceps (Q)</b>        |                   |         |         |                           |          |          |
| Q1                           | 0%                | 0.65%   | 0%      | 0%                        | 0%       | 0%       |
| Q2                           | 0%                | 7.79%   | 0.61%   | 0%                        | 0%       | 0%       |
| Q3                           | 6.84%             | 7.39%   | 0%      | 0%                        | 0%       | 0%       |
| Q4                           | 2.78%             | 0%      | 6.00%   | 0%                        | 0%       | 0.52%    |
| Q5                           | 2.18%             | 0%      | 6.45%   | 0%                        | 0%       | 0%       |
| Q6                           | 1.67%             | 0.45%   | 0%      | 0%                        | 0%       | 0%       |
| Q7                           | 0%                | 5.79%   | 0.56%   | 0.36%                     | 0%       | 0%       |
| Q8                           | 0%                | 0.57%   | 7.59%   | 0%                        | 0%       | 0%       |
| Q9                           | 0.49%             | 0%      | 6.77%   | 0%                        | 0%       | 0%       |
| Q10                          | 0%                | 0%      | 0%      | 0%                        | 0%       | 0%       |

**Supplemental Table 2. Percent Engraftment of eGFP-positive donor cells into *mdx*<sup>5cv</sup> skeletal muscle 30 days after transplantation.** Percentages equal number of eGFP muscle fibers in one section divided by total number of muscle fibers in that section. Statistical analyses (one-tailed t-test) comparing non-zero values above shows that mice that received CXCR4-positive eGFP-positive SP-derived cultured cells had significantly more eGFP-positive fibers than mice who received CXCR4-negative eGFP-positive SP-derived cultured cells (Quadriceps: p=0.001; Tibialis Anterior: p=0.04) and eGFP-positive freshly isolated SP cells (Quadriceps and Tibialis Anterior: p<0.001) in sections in which engraftment was documented. No significant difference in engraftment rates identified between mice that received CXCR4-positive eGFP-positive SP-derived cultured cells and CXCR4-positive eGFP-positive SP-derived cultured cells pretreated with CXCR4 blocking antibody (Quadriceps: p=0.13; Tibialis Anterior: p=0.41). SP = side population. Ab = blocking antibody against CXCR4. T1-T10 = sections from tibialis anterior muscle. Q1-Q10 = sections from quadriceps muscle. eGFP = enhanced green fluorescent protein.
